# Supplementary material for: Mechanical sensing protein PIEZO1 regulates bone homeostasis via osteoblast-osteoclast crosstalk
Source: PubMed Central journal article supplement (PMC6962448; doi:10.1038/s41467-019-14146-6), 2020-01-15
Supplement: 41467_2019_14146_MOESM1_ESM.pdf [file 41467_2019_14146_MOESM1_ESM.pdf]

## Supplementary Information

### **Mechanical sensing protein PIEZO1 regulates bone homeostasis via osteoblast-osteoclast crosstalk**

Wang et al.

Supplementary Information contains

Supplementary Figures 1 – 11

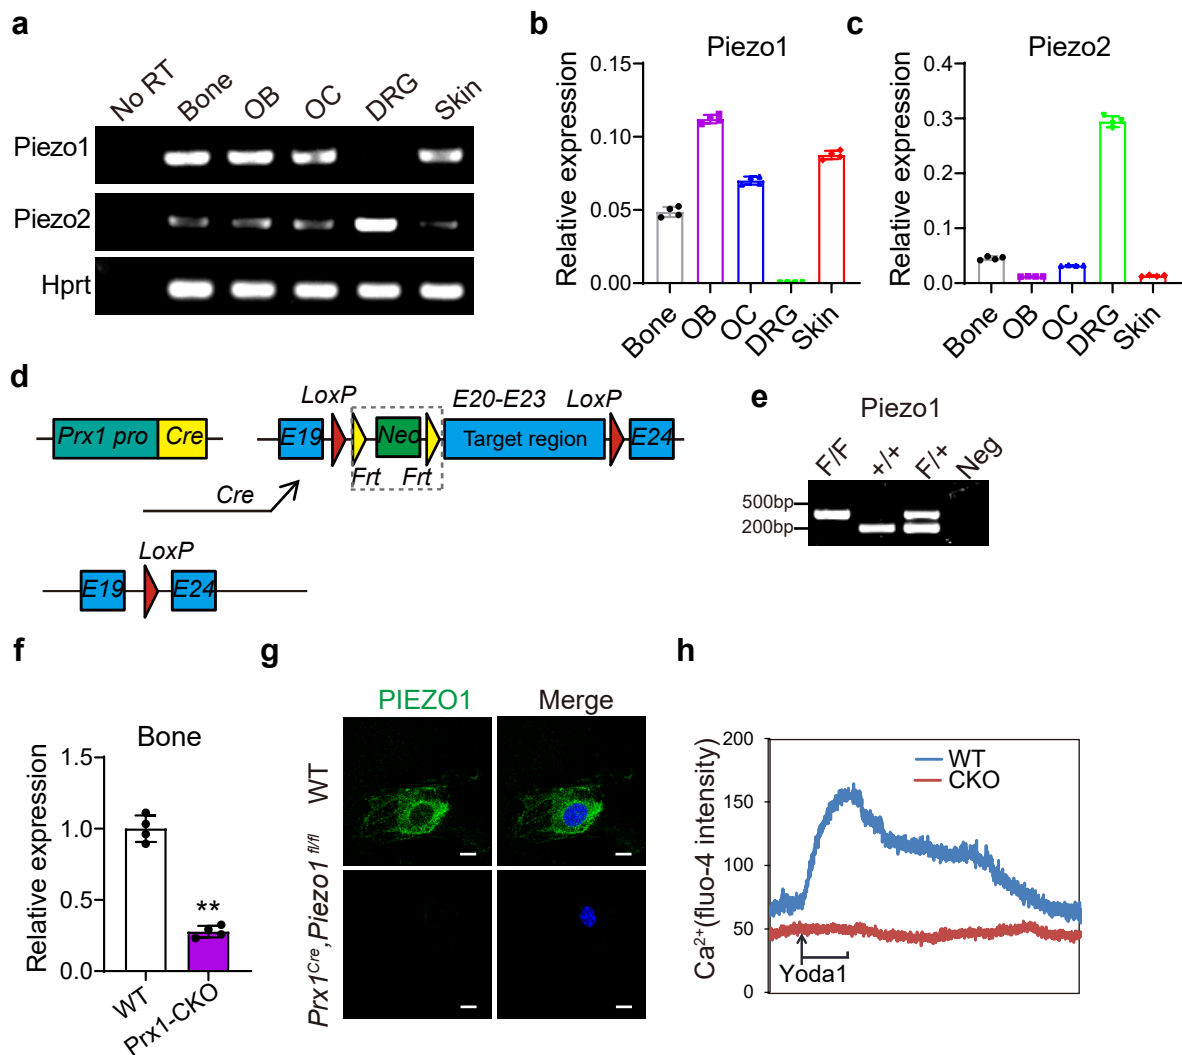

**Supplementary Fig. 1** *Piezo1*-deficient bone cells exhibited impaired calcium influx.

**a** RT-PCR analysis of *Piezo1*, *Piezo2* and *Hprt* transcript levels in the whole bone, osteoblasts (OB), osteoclasts (OC), dorsal root ganglion (DRG) and skin of the mice. **b-c** mRNA expression profiles of *Piezo1* (**b**) and *Piezo2* (**c**) determined by qPCR from the indicated adult mouse tissues. **d** *Prx1*<sup>Cre</sup>, *Piezo1*<sup>fl/fl</sup> mice construction strategy. **e** Genotyping of the *Piezo1*<sup>fl/fl</sup>, WT and *Piezo1*<sup>fl/+</sup> mice. **f** QPCR analysis of the *Piezo1* expression in the bones of WT and *Prx1*<sup>Cre</sup>, *Piezo1*<sup>fl/fl</sup> mice. **g** Immunofluorescence assay of PIEZO1 in the osteoblast progenitors isolated from WT and *Prx1*<sup>Cre</sup>, *Piezo1*<sup>fl/fl</sup> mice. Scale bar = 10  $\mu$ m. **h** Calcium influx of BMSCs-derived osteoblasts stimulated by Yoda1 (10  $\mu$ m), cells were isolated from WT and *Prx1*<sup>Cre</sup>, *Piezo1*<sup>fl/fl</sup> mice. Average trace of all cells (>8 cells) indicated Fluo-4 fluorescence changed over time. Source data are provided in the Source Data File.

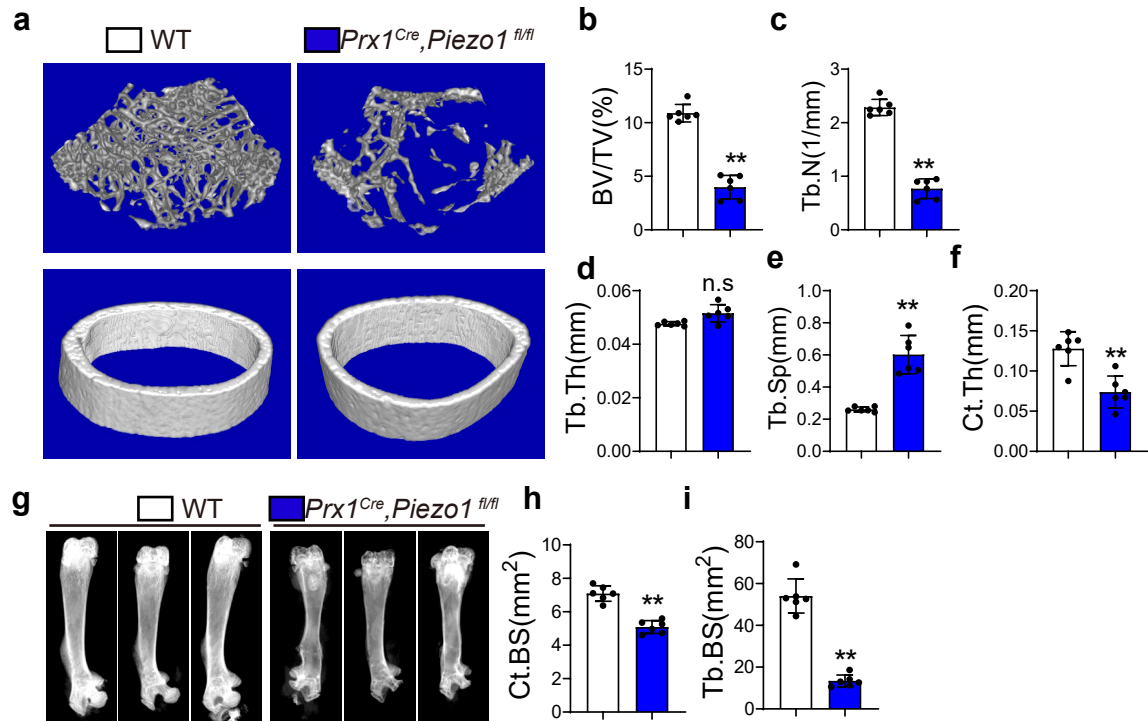

**Supplementary Fig. 2** Loss of *Piezo1* in skeletal cells resulted in osteoporosis.

**a** 3D  $\mu$ -CT images of trabecular bones of distal femurs isolated from 6-week-old female WT and *Prx1<sup>Cre</sup>, Piezo1<sup>fl/fl</sup>* mice. **b-f**  $\mu$ -CT analysis of distal femurs from 6-week-old female WT and *Prx1<sup>Cre</sup>, Piezo1<sup>fl/fl</sup>* mice for bone volume per tissue volume (BV/TV) (**b**), trabecular number (Tb.N) (**c**), trabecular thickness (Tb.Th) (**d**), trabecular spacing (Tb.Sp) (**e**) and cortical thickness (Ct.Th) of middle shaft of femurs (**f**). Data are mean  $\pm$  SD, n = 6. **g** X-ray images of the femurs from 6-week-old male WT and *Prx1<sup>Cre</sup>, Piezo1<sup>fl/fl</sup>* mice. Representative images for 6 independent samples. **h-i**  $\mu$ -CT analysis of the distal femurs from 6-week-old male WT and *Prx1<sup>Cre</sup>, Piezo1<sup>fl/fl</sup>* mice for cortical bone surface (Ct.BS) (**h**) and trabecular bone surface (Tb.BS) (**i**). Data are mean  $\pm$  SD, n = 6. \*P < 0.05; \*\*P < 0.01. Two-tailed Student's t-test. Source data are provided in the Source Data File.

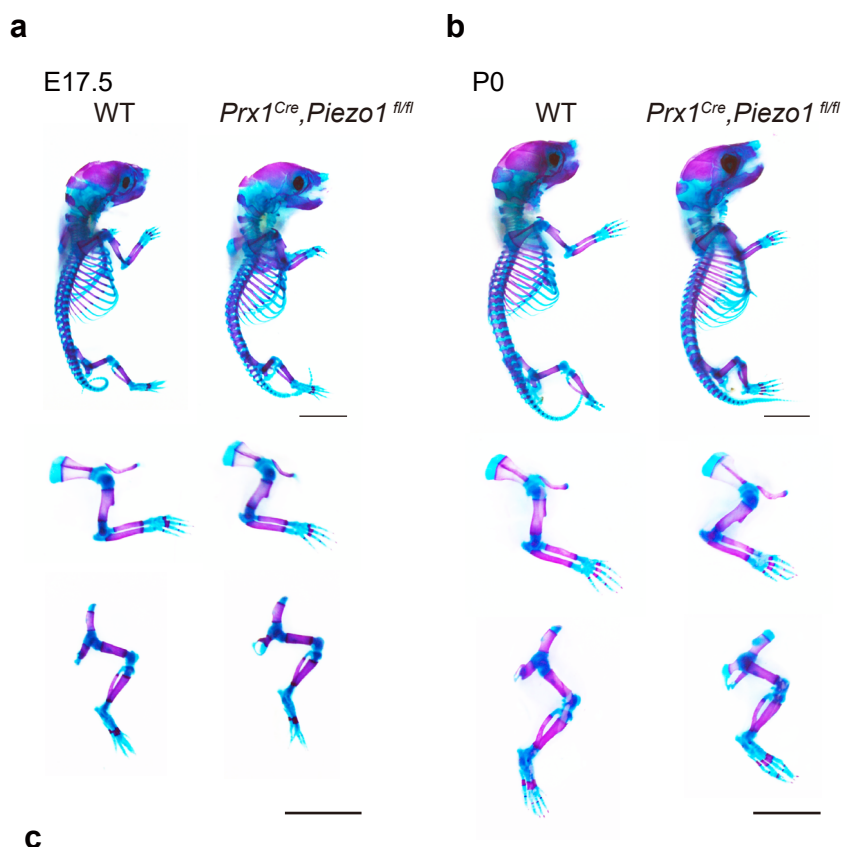**c**

| Frequency of bone fractures |       |                                                       |
|-----------------------------|-------|-------------------------------------------------------|
|                             | WT(%) | <i>Prx1<sup>Cre</sup>, Piezo1<sup>fl/fl</sup></i> (%) |
| Humerus and ulna            | 0     | 88.89                                                 |
| Radius                      | 0     | 44.44                                                 |
| Scapula                     | 0     | 11.11                                                 |
| Femur                       | 0     | 100                                                   |
| Tibia                       | 0     | 88.89                                                 |
| Rib                         | 0     | 11.11                                                 |
| Phalanx                     | 0     | 11.11                                                 |
|                             | n=8   | n=9                                                   |

**Supplementary Fig. 3** Loss of *Piezo1* in bone showed defects after weight-bearing.

**a-b** Whole mount skeleton staining of WT and *Prx1<sup>Cre</sup>, Piezo1<sup>fl/fl</sup>* mice by Alcian blue and Alizarin red S at embryonic day 17.5 (**a**) and postnatal day 0 (**b**). Representative images for more than 3 independent samples. Scale bar = 5mm. **c** Quantification of the frequency of fractures occurred in 3-day-old WT and *Prx1<sup>Cre</sup>, Piezo1<sup>fl/fl</sup>* mice. WT, n = 8; CKO, n = 9.

## Supplementary Figure 4

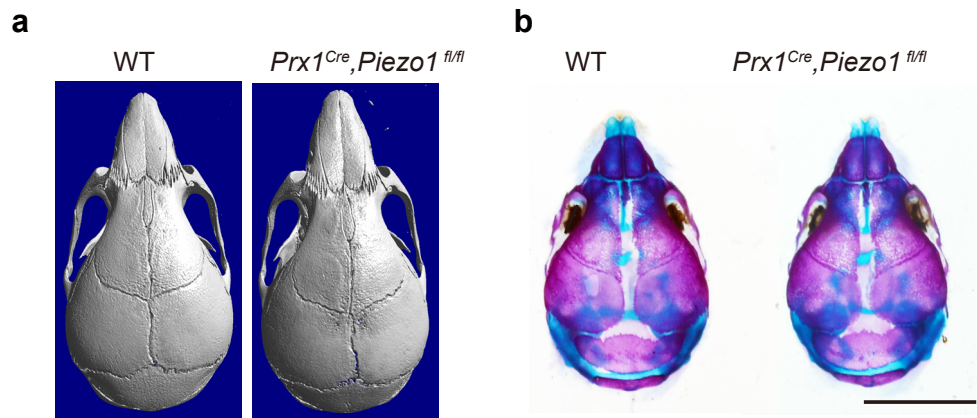

**Supplementary Fig. 4** Loss of *Piezo1* did not affect the skull significantly.

**a** 3D  $\mu$ -CT images of the cranial bones isolated from 3-week-old male WT and *Prx1<sup>Cre</sup>, Piezo1<sup>fl/fl</sup>* mice. Representative images for 3 independent samples. **b** Alcian blue and Alizarin red S staining of the skulls of WT and *Prx1<sup>Cre</sup>, Piezo1<sup>fl/fl</sup>* mice at postnatal day 3. Representative images for more than 3 independent samples. Scale bar = 5mm.

## Supplementary Figure 5

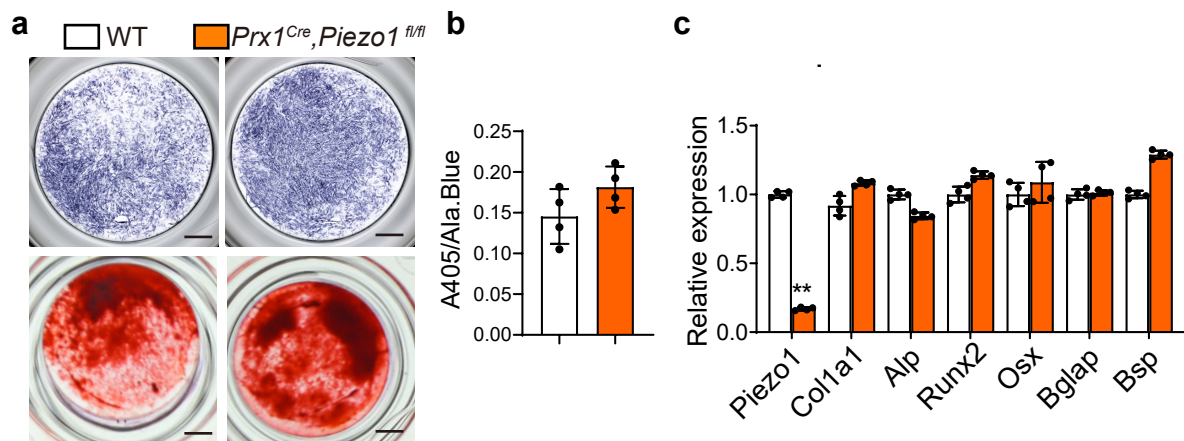

**Supplementary Fig. 5** Loss of *Piezo1* exhibited no obvious effect on osteogenesis.

**a** ALP staining (top) after osteoblast differentiation for 7 days and Alizarin red S staining (bottom) for 21 days. Scale bar = 1mm. **b** ALP activity was measured by phosphatase substrate assay. **c** QPCR analysis of *Piezo1*, *Col1a1*, *Alp*, *Runx2*, *Osx*, *Bglap* and *Bsp* expression after osteoblast differentiation for 7 days, cells were isolated from WT and *Prx1<sup>Cre</sup>, Piezo1<sup>fl/fl</sup>* mice. \*P < 0.05; \*\*P < 0.01. Two-tailed Student's t-test. Data are mean ± SD, n = 4. Source data are provided in the Source Data File.

## Supplementary Figure 6

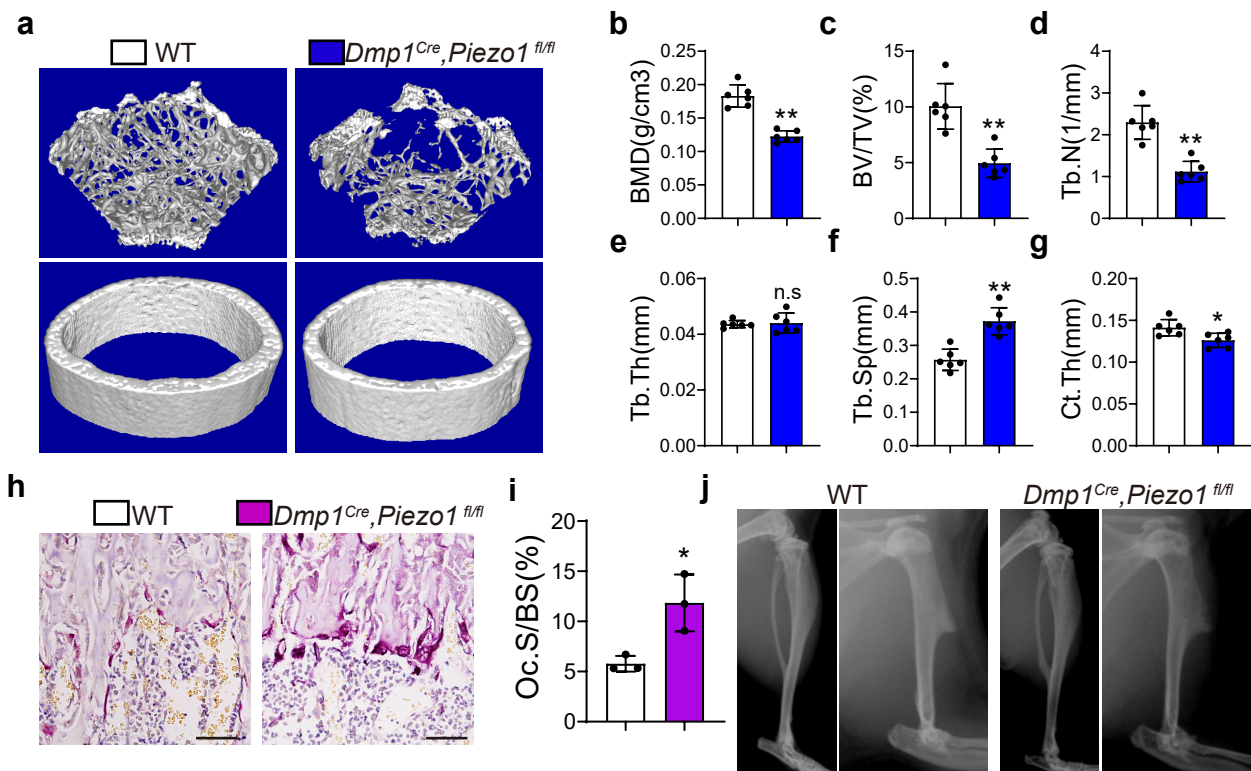

### Supplementary Fig. 6 Loss of *Piezo1* in osteocytes affected the bone resorption and bone mass.

**a** 3D  $\mu$ -CT images of trabecular bones of distal femurs isolated from 6-week-old female WT and  $Dmp1^{Cre}, Piezo1^{fl/fl}$  mice. **(b-g)**  $\mu$ -CT analysis of distal femurs from 6-weeks-old female WT and  $Dmp1^{Cre}, Piezo1^{fl/fl}$  mice for bone mineral density (BMD) (**b**), bone volume per tissue volume (BV/TV) (**c**), trabecular number (Tb.N) (**d**), trabecular thickness (Tb.Th) (**e**), trabecular spacing (Tb.Sp) (**f**) and cortical thickness (Ct.Th) of middle shaft of femurs (**g**). Data are mean  $\pm$  SD, n = 6. **h** TRAP staining of the femurs isolated from 6-week-old WT and  $Dmp1^{Cre}, Piezo1^{fl/fl}$  mice. Scale bar = 50  $\mu$ m. **i** Quantification of the TRAP staining by osteoclast surface per bone surface (Oc.S/BS). Data are mean  $\pm$  SD, n = 3. **j** X-ray images of the long bones from 6-week-old male WT and  $Dmp1^{Cre}, Piezo1^{fl/fl}$  mice. Representative images for 3 independent samples. \*P < 0.05; \*\*P < 0.01. Two-tailed Student's t-test. Source data are provided in the Source Data File.

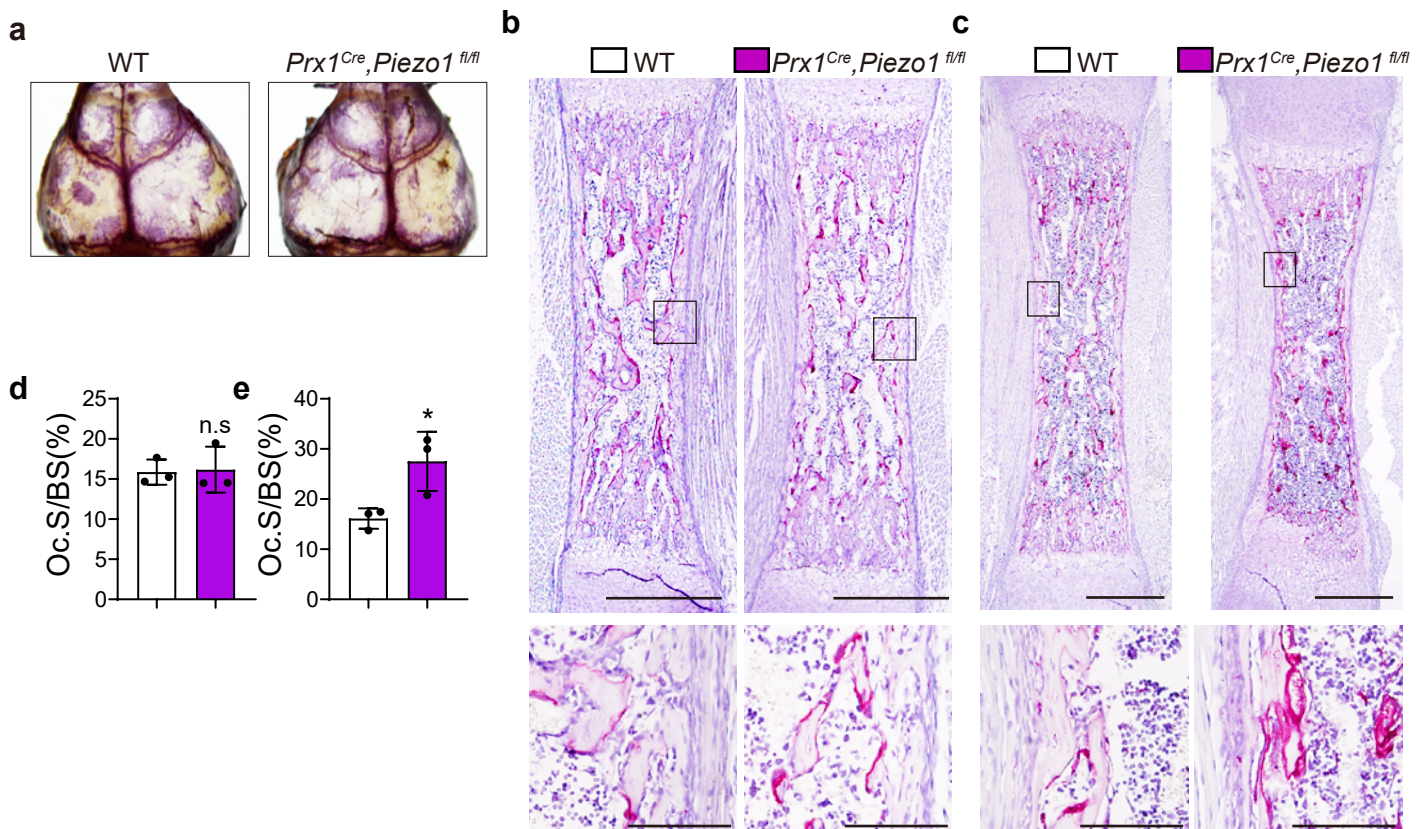

**Supplementary Fig. 7** Increased bone resorption caused by loss of *Piezo1* was onset since weight-bearing. **a** Whole-mount TRAP staining for the skulls of 3-week-old male mice. Representative images for 3 independent samples. **b-c** TRAP staining of the femurs isolated from WT and *Prx1<sup>Cre</sup>, Piezo1<sup>fl/fl</sup>* mice at postnatal day 0 (**b**) and postnatal day 3 (**c**). Scale bars, top, 500  $\mu\text{m}$ ; bottom, 100  $\mu\text{m}$ . **d-e** Quantification of the osteoclast surface per bone surface at postnatal day 0 (**d**) and postnatal day 3 (**e**). \* $P < 0.05$ ; \*\* $P < 0.01$ . Two-tailed Student's t-test. Data are mean  $\pm$  SD,  $n = 3$ . Source data are provided in the Source Data File.



## Supplementary Figure 8

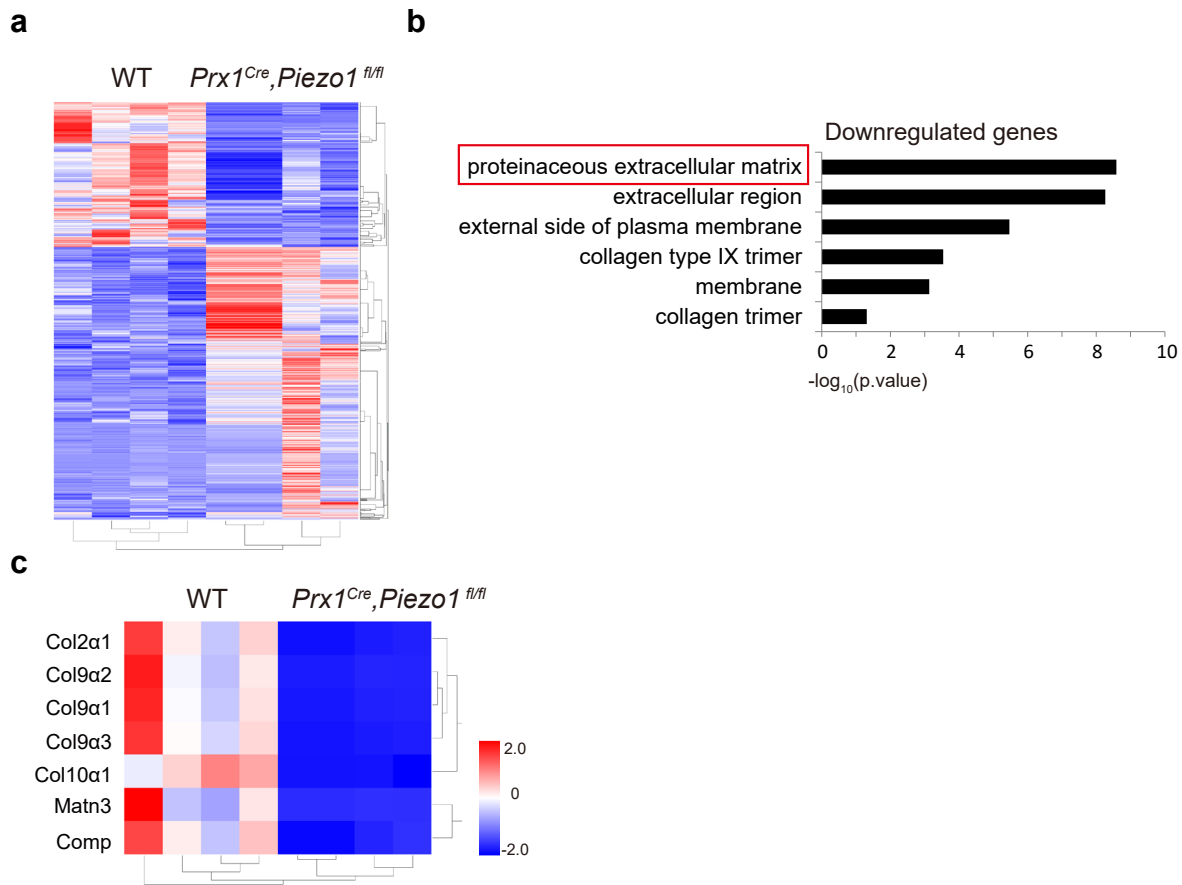

### Supplementary Fig. 8 Extracellular proteins were dysregulated in *Prx1<sup>Cre</sup>, Piezo1<sup>fl/fl</sup>* mice.

**a** Heat map of the genes (FoldChange > 1.5, P.value < 0.05) from RNA-seq data (GSE135282) of the cortical bones isolated from the 3-week-old WT and *Prx1<sup>Cre</sup>, Piezo1<sup>fl/fl</sup>* mice to compare the difference of gene expression. The genes were ordered by clustering tightness. Each row represented a single RNA-seq data, n = 4. **b** Gene ontology (GO) enrichment analysis of downregulated genes (FoldChange > 1.5, p.value < 0.05). **c** Heat map of extracellular matrix genes from RNA-seq data of cortical bone isolated from 3-week-old WT and *Prx1<sup>Cre</sup>, Piezo1<sup>fl/fl</sup>* mice. The genes were ordered by clustering tightness. Each row represented a single RNA-seq data, n = 4.

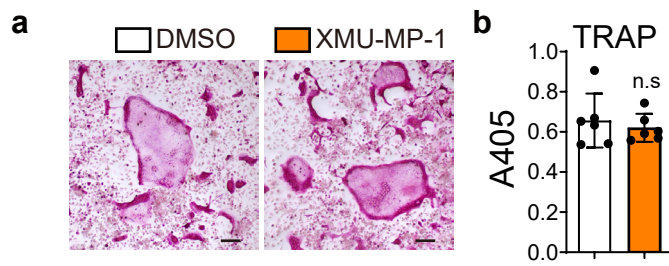

**Supplementary Fig. 9** Xmump1 did not inhibit osteoclast differentiation.

**a** Bone marrow monocytes were seeded in 96-well plates and treated with 20 ng/ml M-CSF and 250 ng/ml RANKL for 6 days with DMSO or XMU-MP-1 (0.2  $\mu$ m). **b** Quantification of the osteoclast differentiation by TRAP activity of the culture supernatants. \*P < 0.05; \*\*P < 0.01. Two-tailed Student's t-test. Data are mean  $\pm$  SD, n = 6. Source data are provided in the Source Data File.

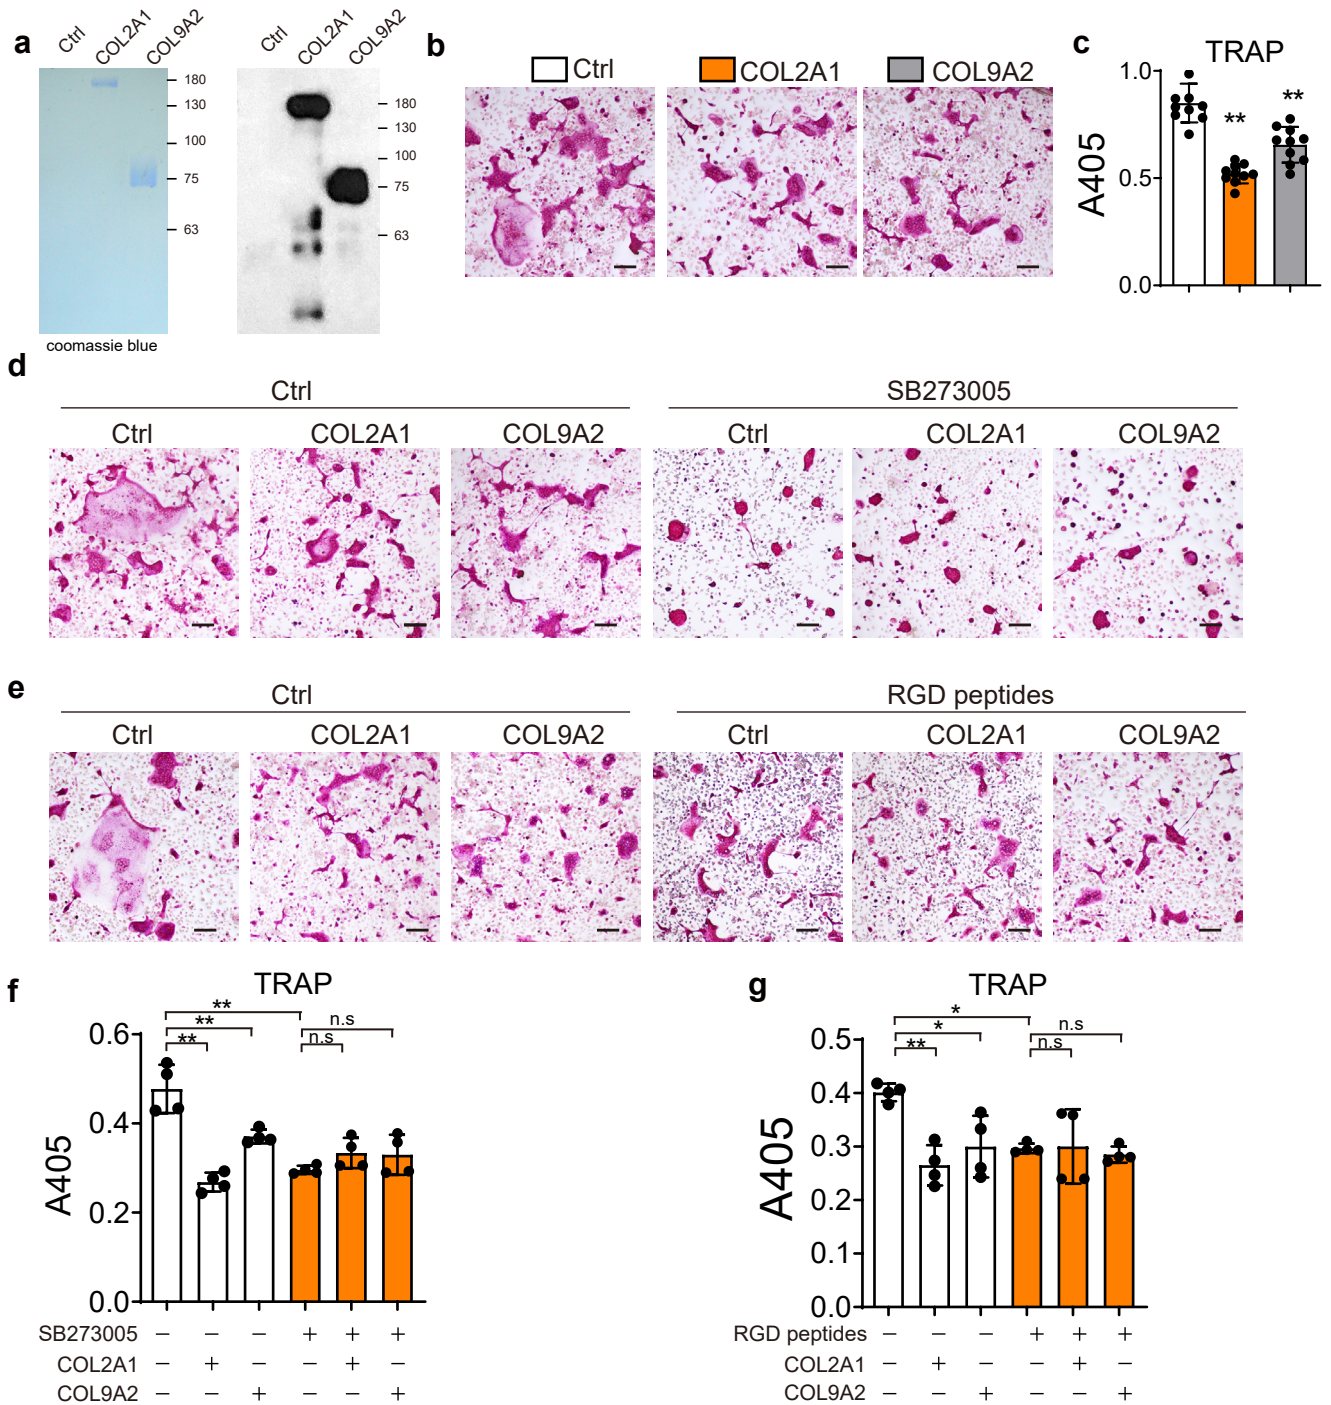

**Supplementary Fig. 10** COL2 $\alpha$ 1 and COL9 $\alpha$ 2 inhibited osteoclastogenesis through integrin pathway.

**a** Analysis of COL2 $\alpha$ 1 and COL9 $\alpha$ 2 enriched from the supernatants of 293T cells transfected with control, *Col2 $\alpha$ 1* or *Col9 $\alpha$ 2* plasmids by coomassie blue staining (left) or western blot of FLAG antibody (right). **b** Bone marrow monocytes were seeded in 96-well plates and treated with 20 ng/ml M-CSF and 250 ng/ml RANKL for 6 days with indicated collagens or control. Scale bar = 100  $\mu$ m. **c** Quantification of the osteoclast differentiation by TRAP activity of the culture supernatants from (**b**). Data are mean  $\pm$  SD, n = 10. **d-e** Bone marrow monocytes were seeded in 96-well plates and treated with 20 ng/ml M-CSF and 250 ng/ml RANKL for 6 days with indicated treatment. Scale bar = 100  $\mu$ m. **f-g** Quantification of the osteoclast differentiation by TRAP activity of the culture supernatants from (**d-e**). Data are mean  $\pm$  SD, n = 4. \*P < 0.05; \*\*P < 0.01. Ordinary one-way ANOVA. Source data are provided in the Source Data File.

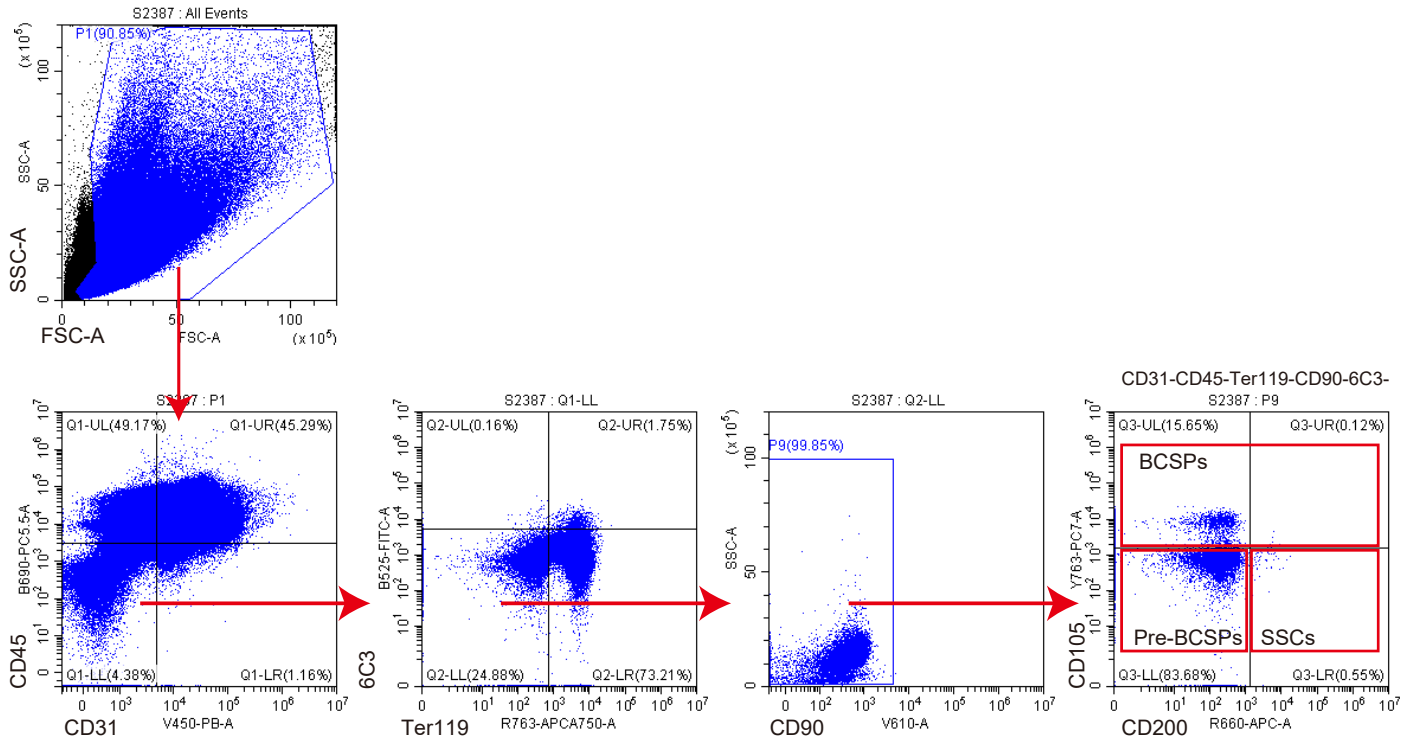

**Supplementary Fig. 11** Gating strategy.

Live cells were gated on SSC-A/FSC-A, and then SSCs (CD105- CD200+), BSCPs (CD105+) and pre-BSCPs (CD105- CD200-) were gated from CD31-CD45-Ter119-CD90-6C3-live cells. The boundary between "positive" and "negative" was defined by the single positive control and the negative control.
